# Supplementary material for: Integrated network analysis reveals distinct regulatory roles of transcription factors and microRNAs
Source: PubMed Central journal article supplement — RNA. 2016 Nov;22(11):1663–72. doi: 10.1261/rna.048025.114 (PMC5066619; doi:10.1261/rna.048025.114), 2016-11

# **Integrated network analysis reveals distinct regulatory roles of transcription factors and microRNAs**

Yu Guo<sup>1,2,4</sup>, Katherine Alexander<sup>1</sup>, Andrew G Clark<sup>1</sup>, Andrew Grimson<sup>1</sup> and Haiyuan

Yu<sup>2,3\*</sup>

<sup>1</sup>Department of Molecular Biology and Genetics, <sup>2</sup>Weill Institute for Cell and Molecular Biology, <sup>3</sup>Department of Biological Statistics and Computational Biology, Cornell University, Ithaca, NY 14853, USA. <sup>4</sup>Present address: Computational and Systems Biology, Genome Institute of Singapore, 60 Biopolis Street, #02-01 Genome, Singapore 138762, Singapore

\*To whom correspondence should be addressed. Email: [haiyuan.yu@cornell.edu](mailto:haiyuan.yu@cornell.edu)

## SUPPLEMENTARY FIGURE LEGENDS

**Supplementary Figure 1** Synergistic effect of TF and miRNA regulation on the protein interactions of their targets. Average pairwise distance of protein products of gene targets regulated by multiple TFs **(A)** or miRNAs **(B)** in the protein-protein interaction network. Difference in the average pairwise distances between the first and last bins is calculated by the t-test.

**Supplementary Figure 2** Analysis of the synergistic effects of miRNAs on target genes using experimentally verified miRNA targets. **(A)** LOD values for enrichment of mRNA co-expression between gene pairs jointly regulated by multiple miRNAs. **(B)** LOD values for enrichment of protein co-expression between gene pairs jointly regulated by multiple miRNAs. **(C)** LOD values for enrichment of protein-protein interactions between gene pairs jointly regulated by miRNAs **(D)** LOD values for the likelihood of gene pairs jointly regulated by multiple miRNAs to be associated with the same disease. \* $P < 0.05$ .  $P$ -values are calculated by the  $Z$ -test. Difference between the first and last bins of each panel is calculated by the chi-squared test.

**Supplementary Figure 3** Co-regulation of gene targets by inter-regulating TFs and miRNAs. **(A)** Percentage of miRNAs that share targets with TFs that regulate them. **(B)** Percentage of TFs that share targets with miRNAs that regulate them. Error bars indicate  $\pm$ SE.

**Supplementary Figure 4** Inter-regulation of TFs and miRNAs. Distribution of the fraction of co-expressed targets of **(A)** TF pairs regulated by the same miRNA, **(B)** TF pairs regulated by the same TF, and **(C)** miRNA pairs regulated by the same TF.

**Supplementary Figure 5** Inter-regulation of TFs and miRNAs. Distribution of the fraction of interacting targets of **(A)** TF pairs regulated by the same miRNA, **(B)** TF pairs regulated by the same TF, and **(C)** miRNA pairs regulated by the same TF.

**Supplementary Figure 6** Inter-regulation of TFs and miRNAs. Distribution of the similarity scores of **(A)** TF pairs regulated by the same miRNA, **(B)** TF pairs regulated by the same TF, and **(C)** miRNA pairs regulated by the same TF.

**A**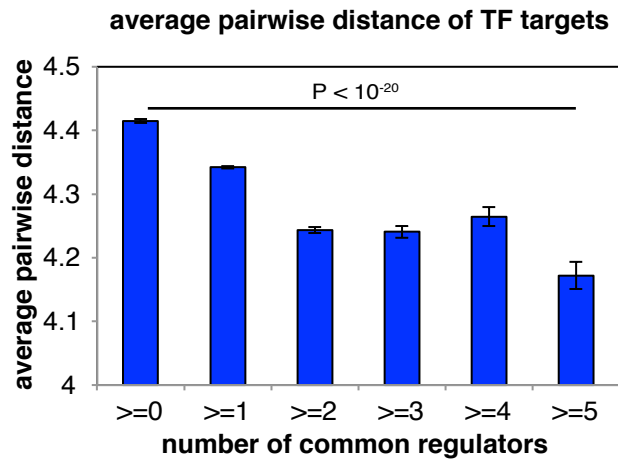**B**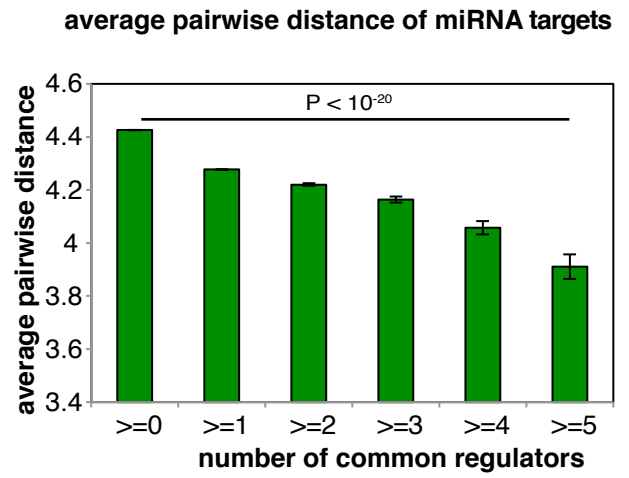

**A** Enrichment of mRNA co-expression

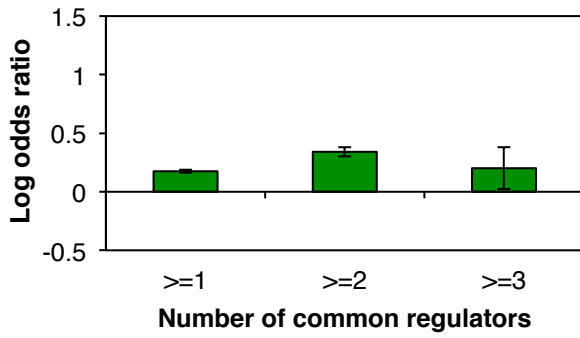

**B** Enrichment of protein co-expression

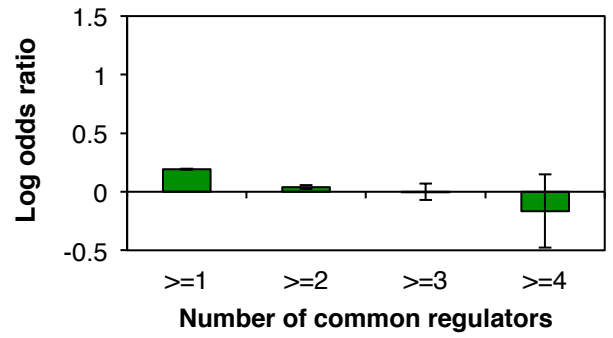

**C** Enrichment of protein-protein interactions

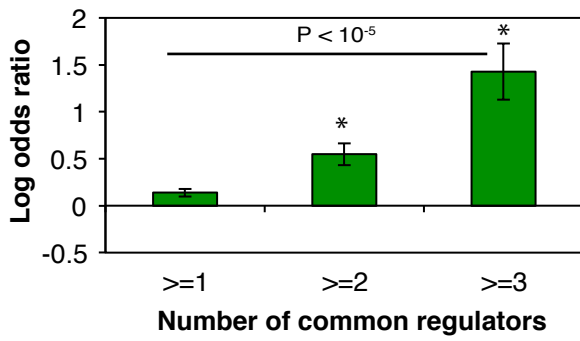

**D** Enrichment of target gene pairs causing the same disease

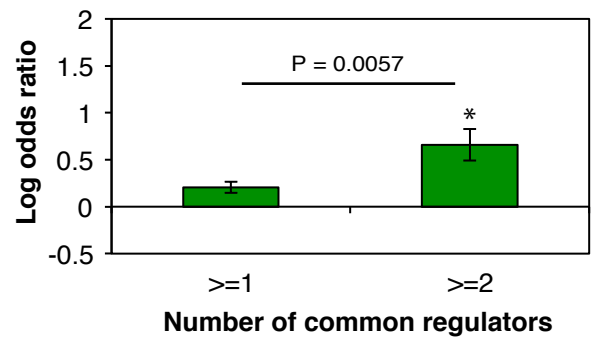

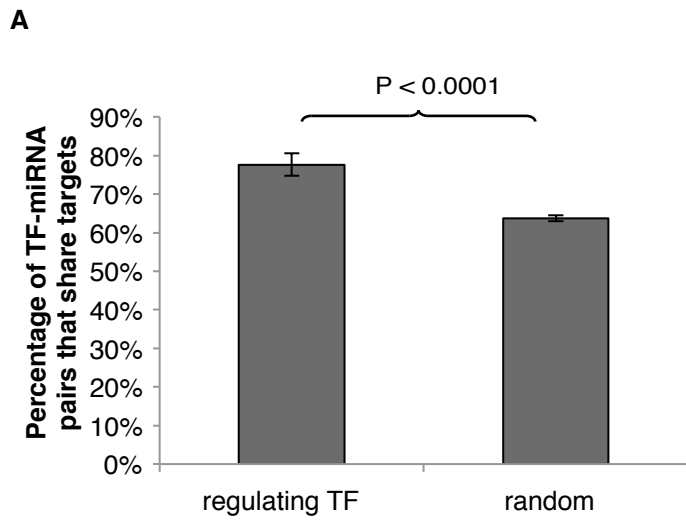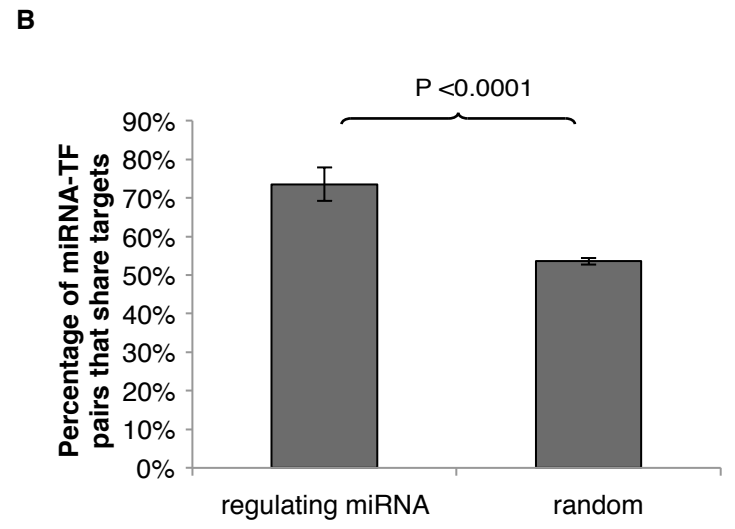

Supplementary Figure 3

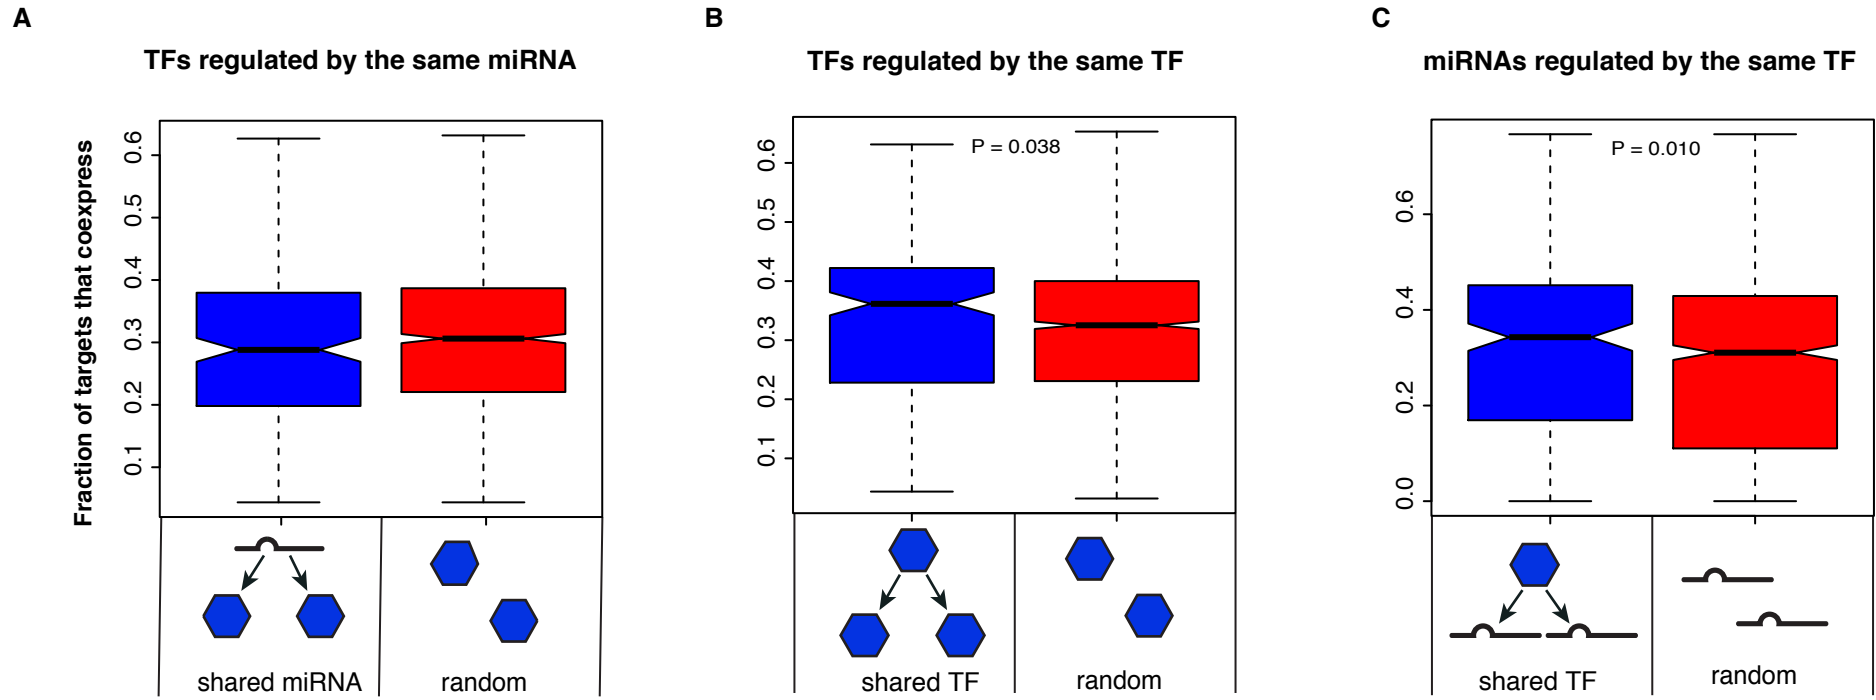

Supplementary Figure 4

**A****TFs regulated by the same miRNA**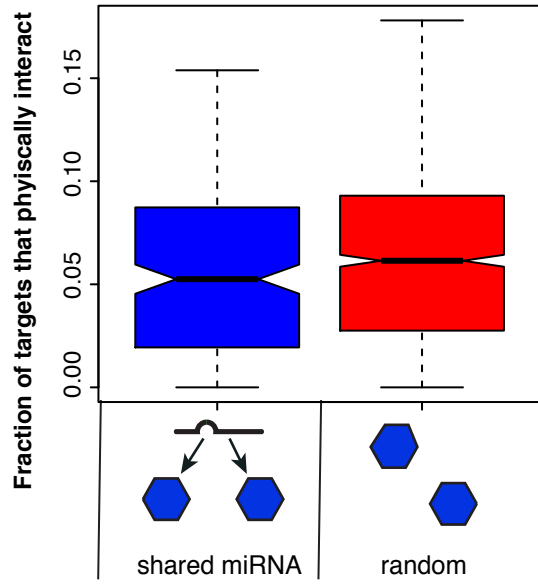**B****TFs regulated by the same TF**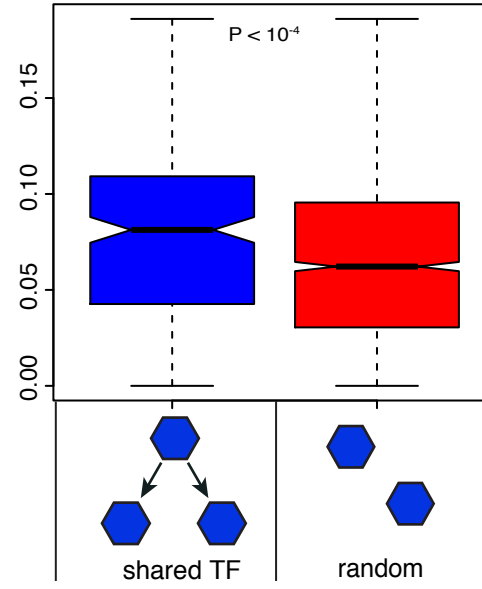**C****miRNAs regulated by the same TF**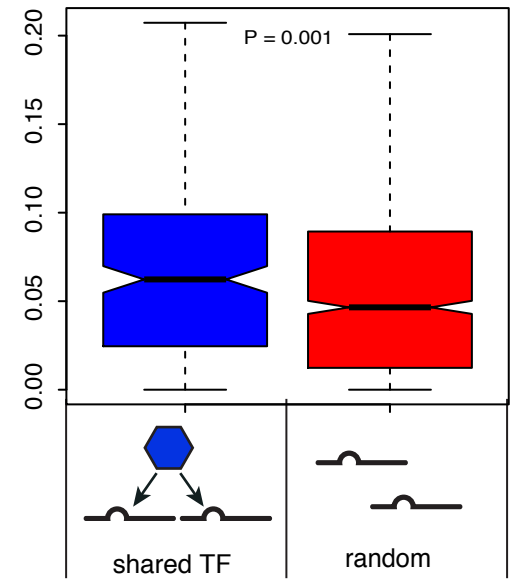

**A****TFs regulated by the same miRNA**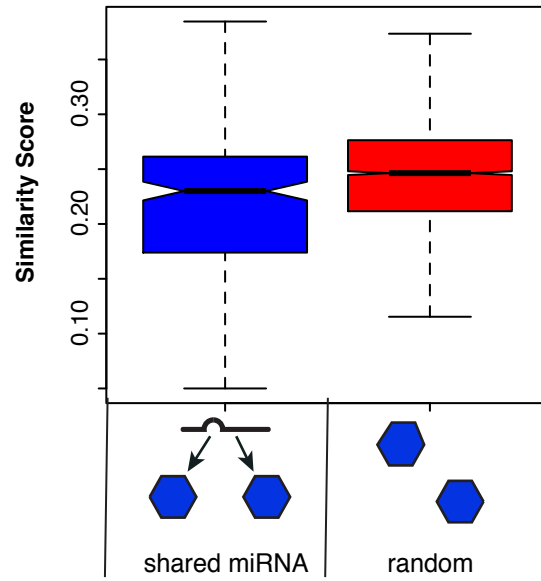**B****TFs regulated by the same TF**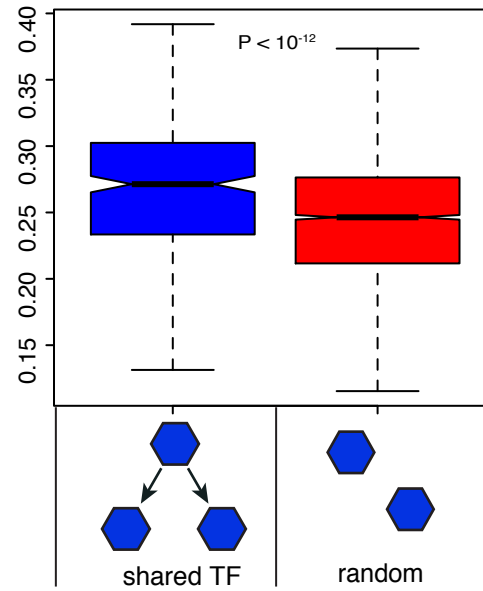**C****miRNAs regulated by the same TF**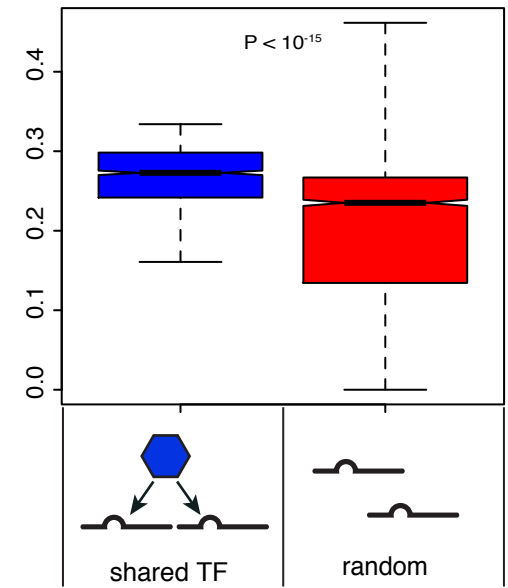

Supplement: supp_048025.114_Supp_Material.pdf [file supp_048025.114_Supp_Material.pdf]
